# Supplementary material
Source: Springer Nature journal article supplement (https://www.springermedizin.de/resource/supplementary/12943_2012_1060_MOESM7_ESM.pdf/9552198)

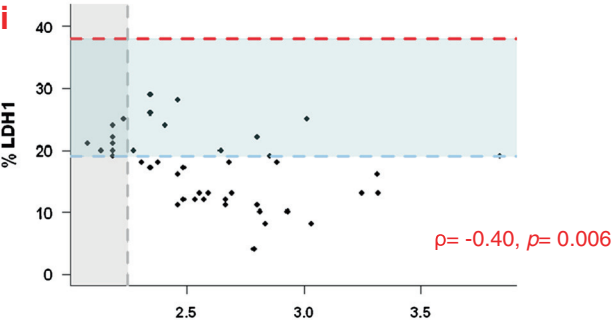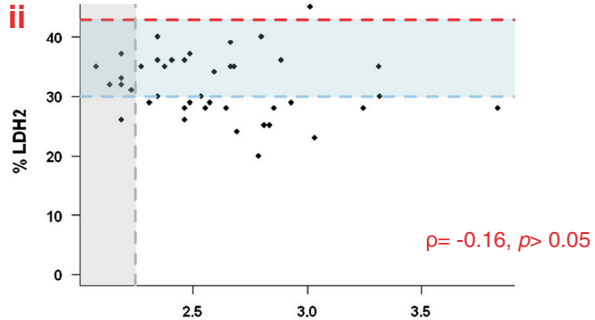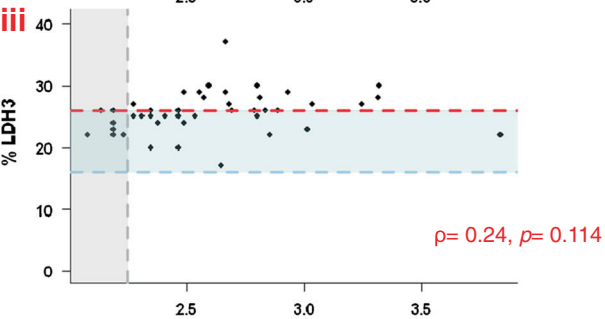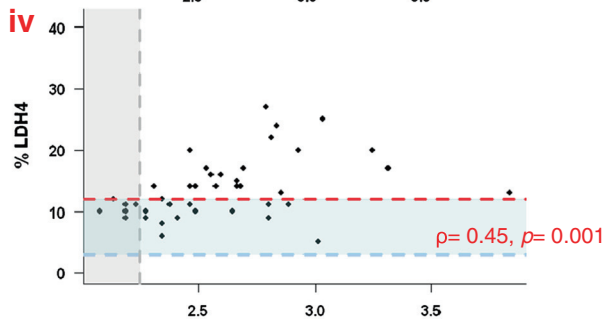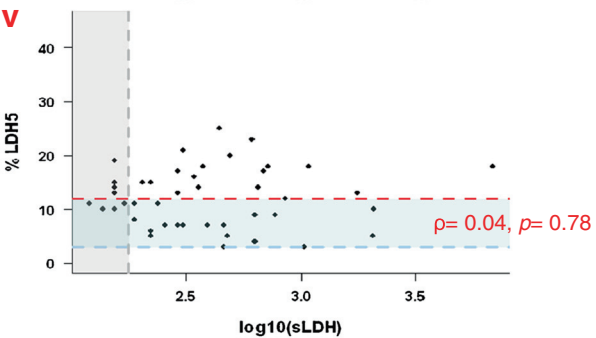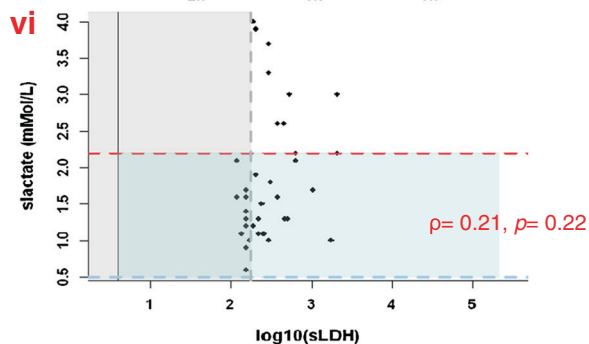

Supplement: MOESM7 [file 9552198]
